# Supplementary material for: TEAD1 trapping by the Q353R–Lamin A/C causes dilated cardiomyopathy
Source: PubMed Central journal article supplement (PMC10104473; doi:10.1126/sciadv.ade7047), 2023-04-14
Supplement: sciadv.ade7047_sm.pdf [file sciadv.ade7047_sm.pdf]

Supplementary Materials for  
**TEAD1 trapping by the Q353R–Lamin A/C causes dilated cardiomyopathy**

Shintaro Yamada *et al.*

Corresponding author: Seitaro Nomura, [senomura-cib@umin.ac.jp](mailto:senomura-cib@umin.ac.jp); Ryo Nitta, [ryonitta@med.kobe-u.ac.jp](mailto:ryonitta@med.kobe-u.ac.jp);  
Hiroyuki Aburatani, [haburata-ky@umin.ac.jp](mailto:haburata-ky@umin.ac.jp); Issei Komuro, [komuro-ky@umin.ac.jp](mailto:komuro-ky@umin.ac.jp)

*Sci. Adv.* 9, eade7047 (2023)  
DOI: 10.1126/sciadv.ade7047

**The PDF file includes:**

Figs. S1 to S7  
Legends for tables S1 to S9

**Other Supplementary Material for this manuscript includes the following:**

Tables S1 to S9

**Fig. S1**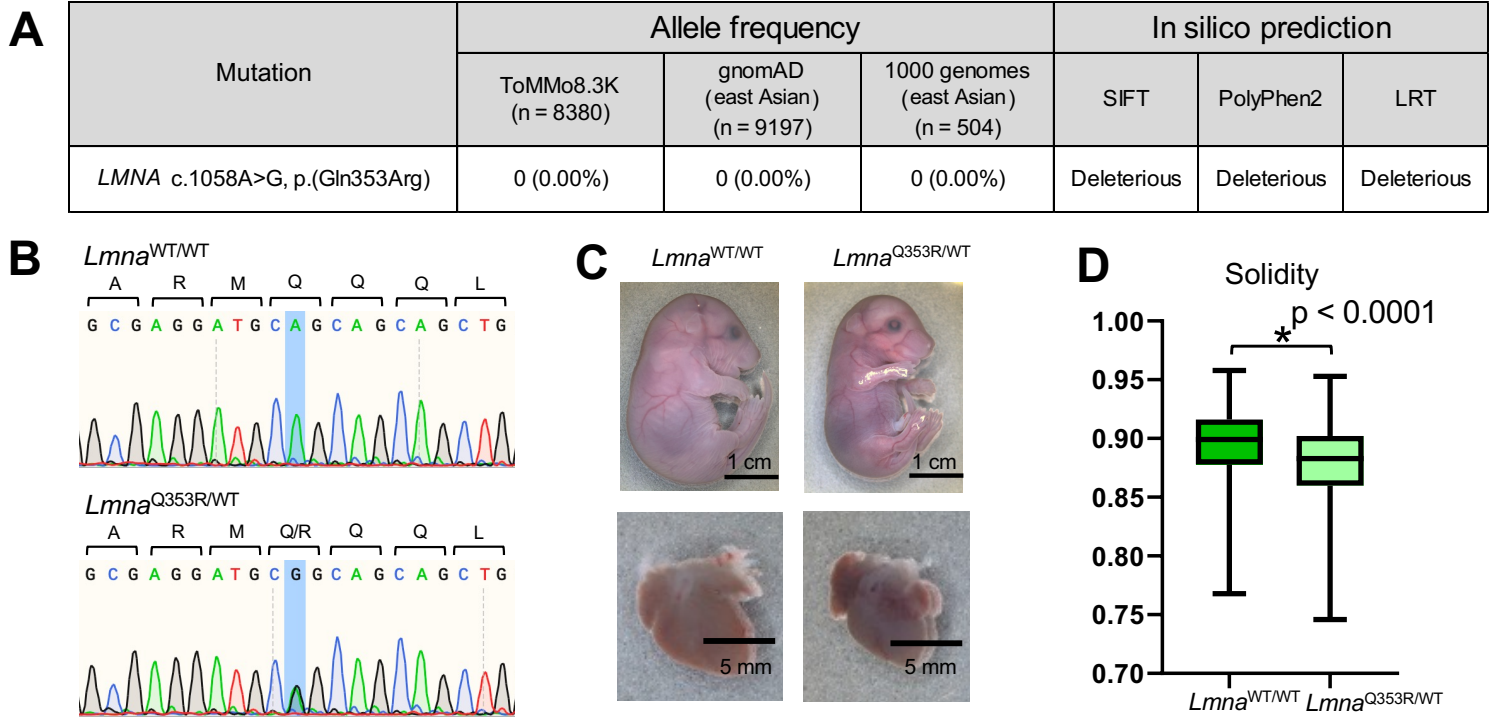

**E*****Lmna*<sup>WT/WT</sup>**

Cerebrum

Lung

Liver

Kidney

Bone

Skeletal muscle

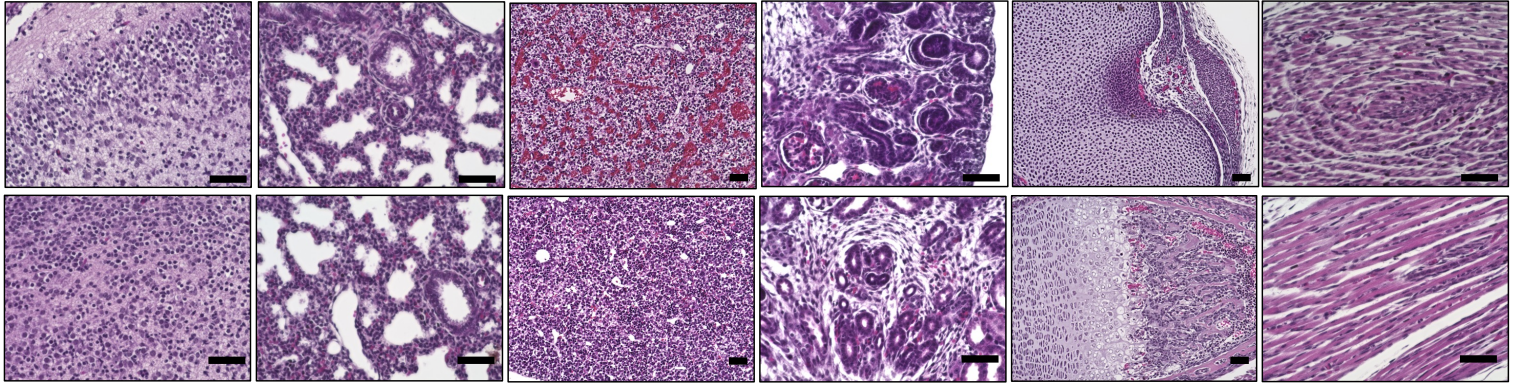***Lmna*<sup>Q353R/WT</sup>**

Cerebrum

Lung

Liver

Kidney

Bone

Skeletal muscle

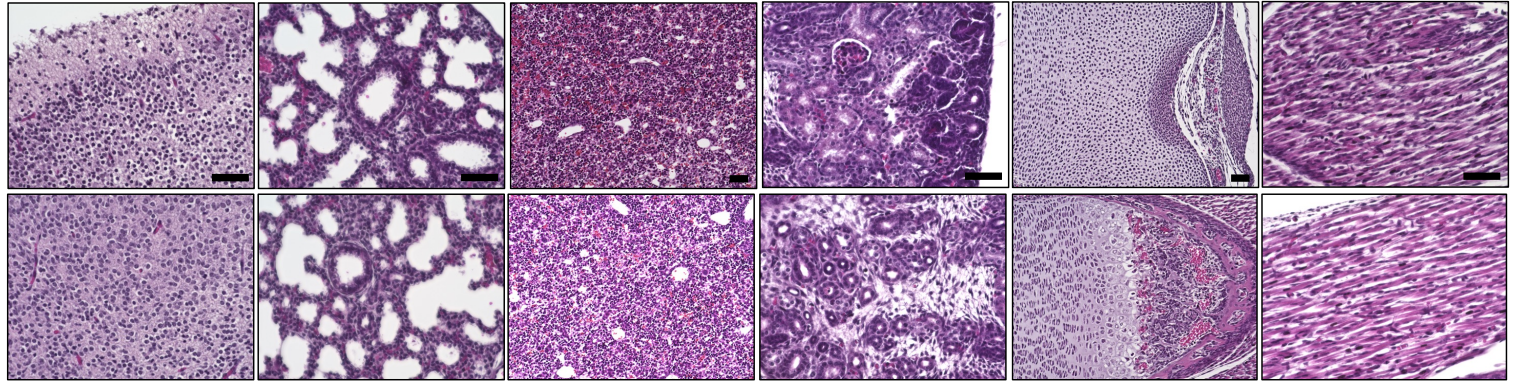**F**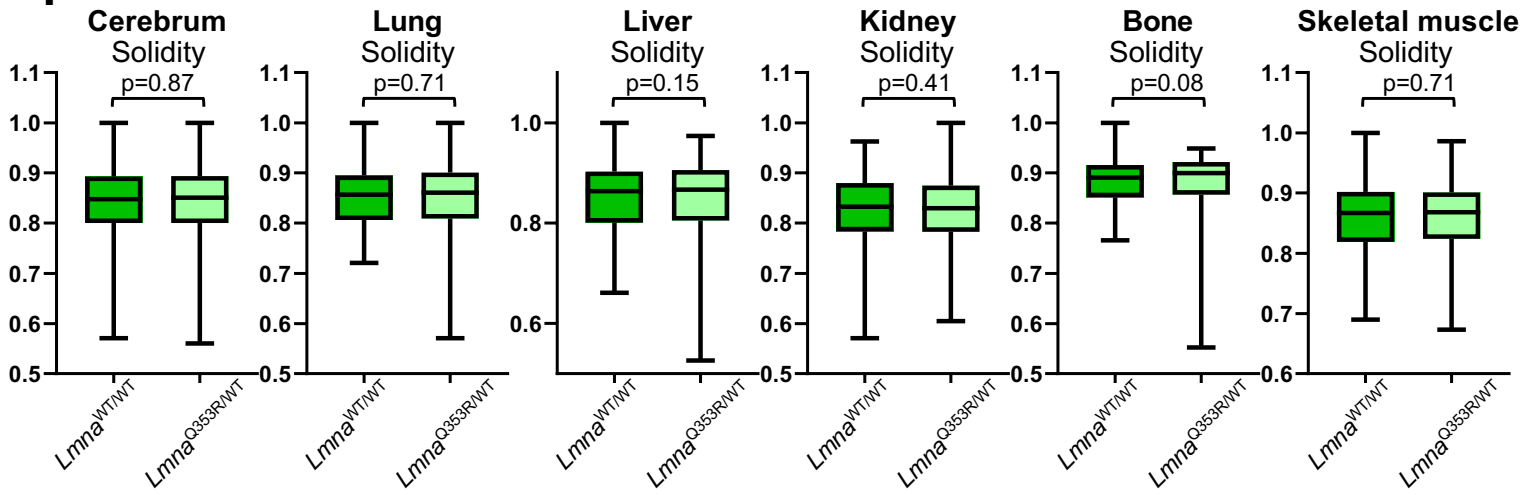

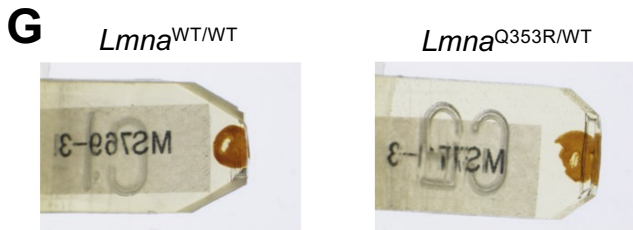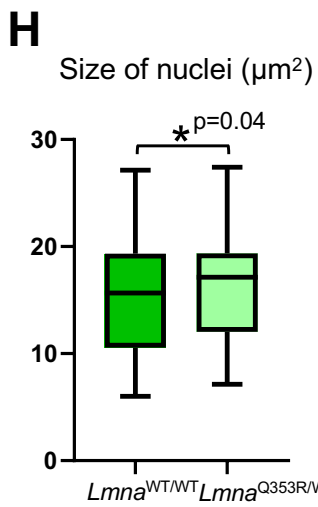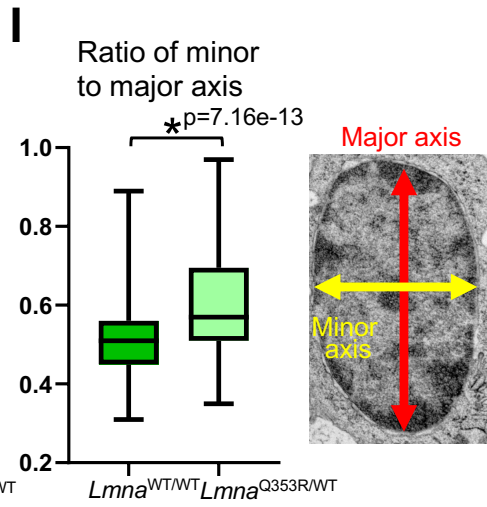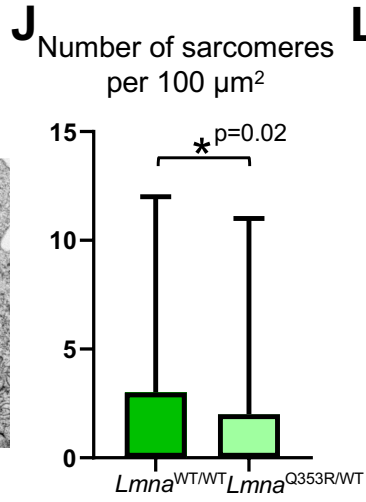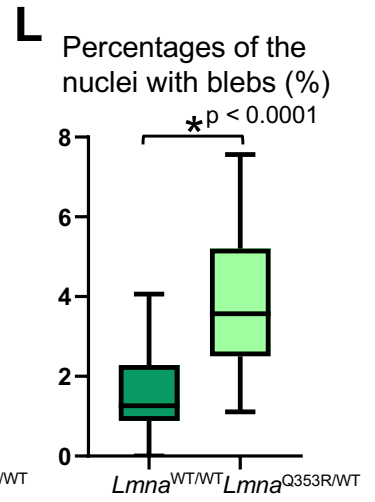

**K** *Lmna*<sup>WT/WT</sup>  $\times 300$

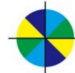

*Lmna*<sup>Q353R/WT</sup>  $\times 300$

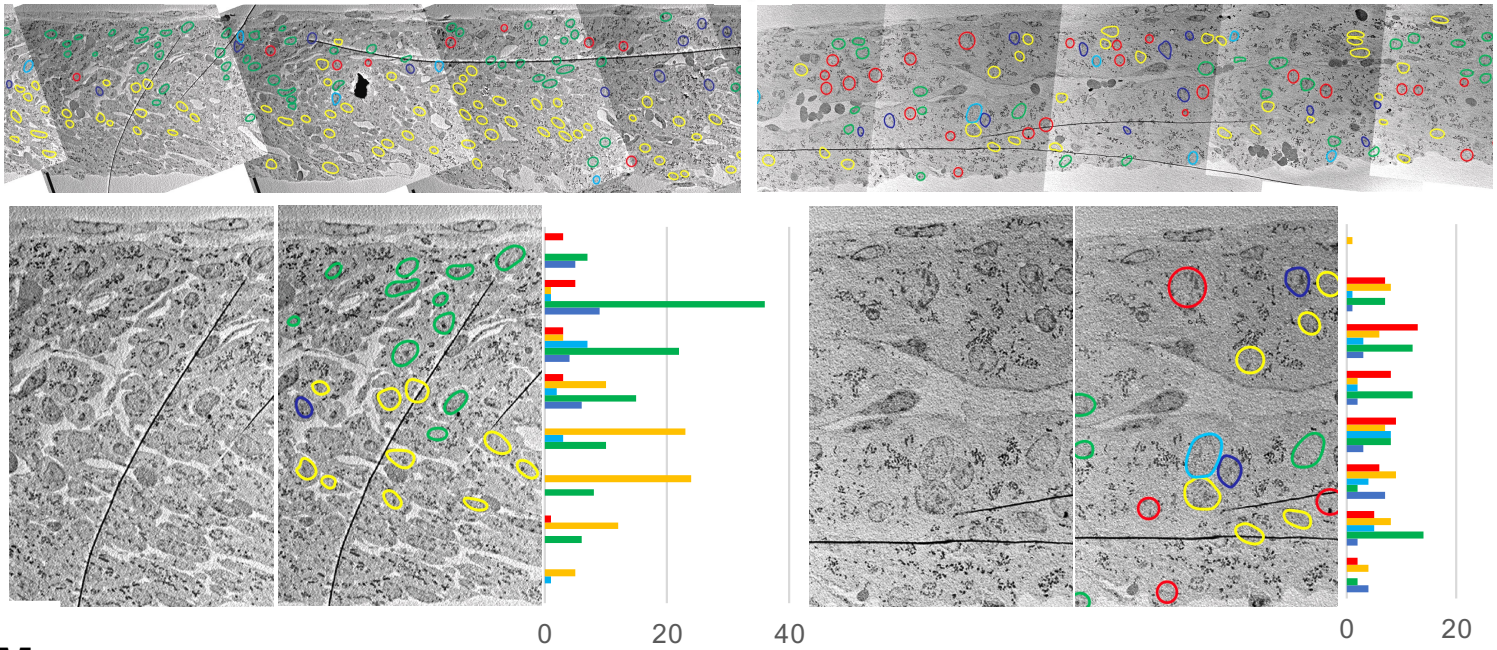

**M** *Lmna*<sup>WT/WT</sup>

*Lmna*<sup>Q353R/WT</sup>

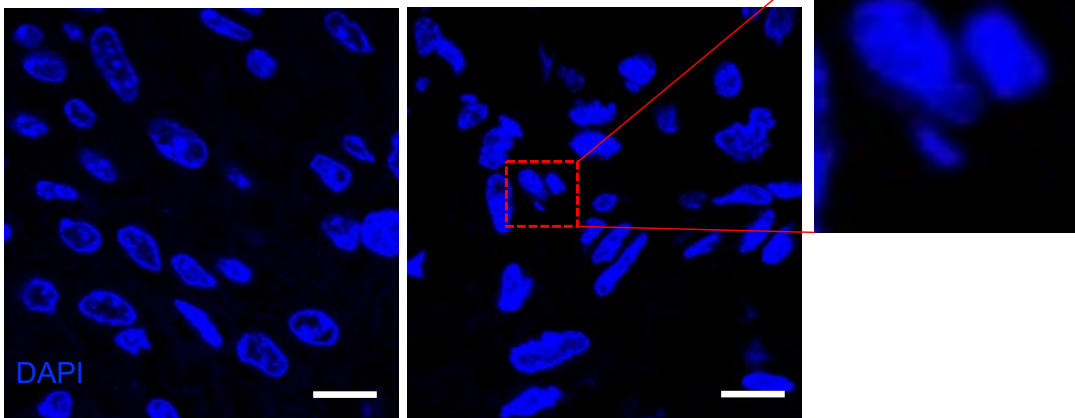

**N** *Lmna*<sup>Q353R/WT</sup>

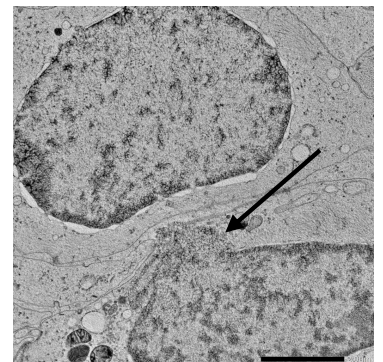

**Fig. S1. Electron microscopic images of heart tissue from *Lmna*<sup>WT/WT</sup> and *Lmna*<sup>Q353R/WT</sup> mice**

**(A)** *LMNA* Q353R mutation analysis showing its allele frequency and in silico functional prediction.

**(B)** Sequence of wild-type (WT) and *Lmna*<sup>Q353R/WT</sup> knock-in (Q353R) mice.

**(C)** Appearances of WT and *Lmna*<sup>Q353R/WT</sup> knock-in mouse embryos and their hearts at embryonic day (E17.5).

**(D)** Box plots showing the solidity values of the nuclei.  $n = 2511$  (WT), 1881 (Q353R).

**(E)** Histological comparison of multiple organs between *Lmna*<sup>WT/WT</sup> and *Lmna*<sup>Q353R/WT</sup> knock-in mice on embryonic day 17.5 (E17.5) by Hematoxylin-eosin staining. Scale bar, 50  $\mu\text{m}$

**(F)** Box plots showing the solidity values of the nuclei of multiple organs.  $n > 6000$  nuclei for each organ in both WT and mutant mice.

**(G)** Electron microscopic specimens of the ventricular wall on E17.5.

**(H)** Box plots showing the sizes of nuclei.  $n = 235$  (WT), 197 (Q353R).

**(I)** (Left) Box plots showing the ratios of the minor to major axis.  $n = 235$  (WT), 197 (Q353R). (Right) A representative electron micrograph of major and minor axes of a nucleus.

**(J)** Box plots showing the number of sarcomeres per 100  $\mu\text{m}^2$ .  $n = 100$  (WT, Q353R).

**(K)** Electron micrographs with tracing of nuclei of cardiomyocytes colored according to the orientation of their major axis (blue, yellow, or green). Red indicates that the nucleus is round and has no orientation. The bar graphs in the bottom panels show the proportion of colored nuclei in each layer.

**(L)** Box plots showing the percentages of the nuclei with blebs in all cardiac cells.  $n = 65$  slices for each WT and Q353R.

**(M)** Representative images of immunostaining of the nuclei in WT and Q353R mice on E17.5. The Bottle panel shows the nuclei with bleb. Blue, DAPI, 4',6-diamidino-2-phenylindole; Scale bar, 10  $\mu\text{m}$ .

**(N)** A representative electron micrograph of the nucleus with bleb in the *Lmna*<sup>Q353R/WT</sup> knock-in mouse on E17.5. An arrow indicates a bleb. Scale bar, 2  $\mu\text{m}$ .

\*,  $p < 0.05$ ; significance was determined by unpaired t-test.

**Fig. S2**

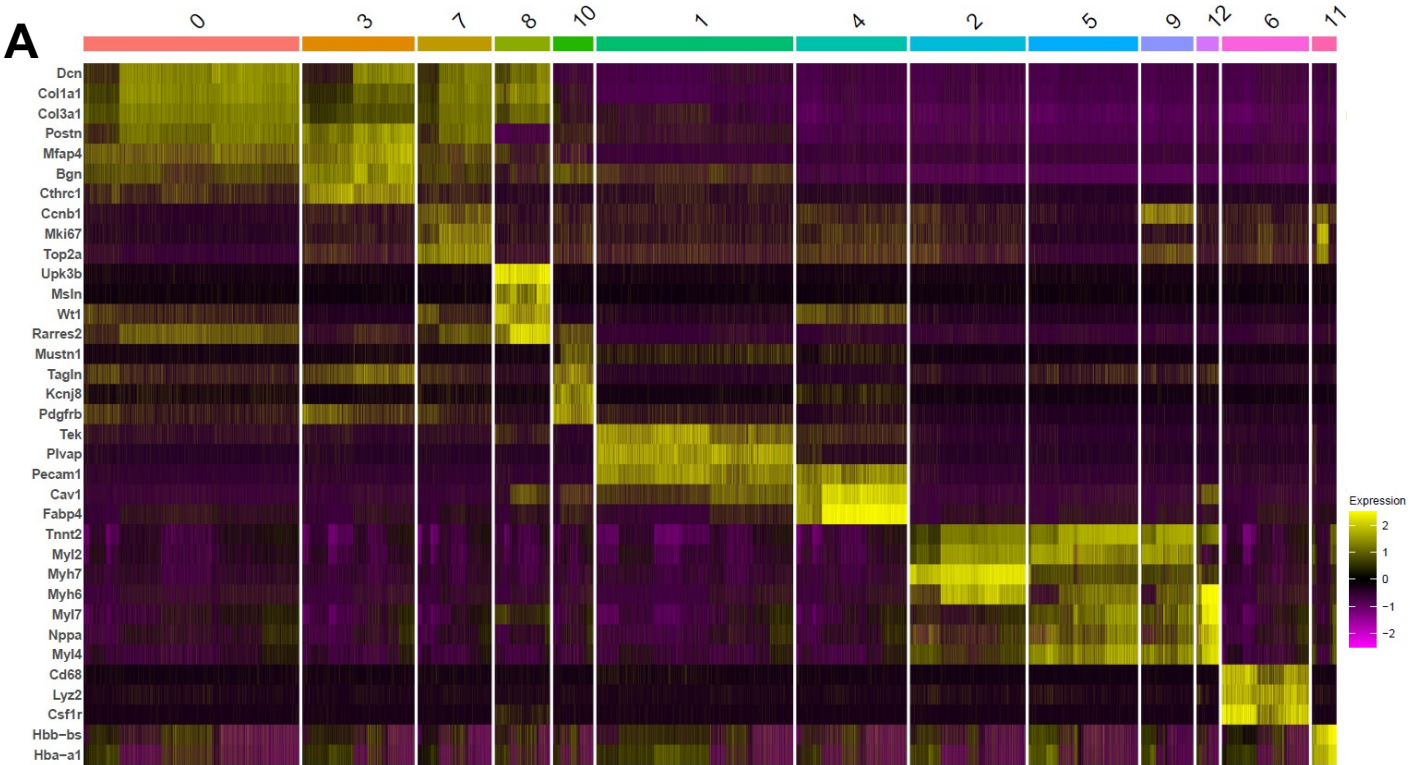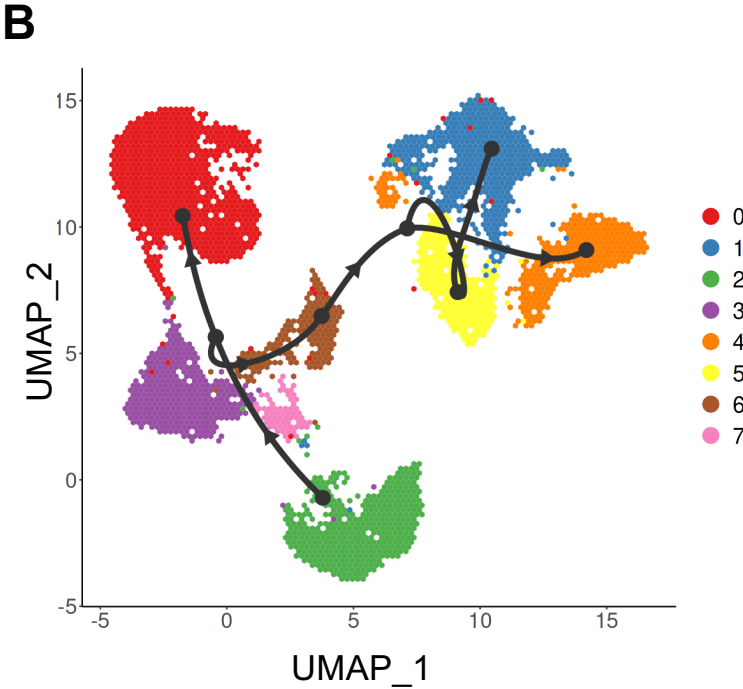

**Fig. S2. Single-cell RNA-seq analysis of hearts from *Lmna*<sup>Q353R/WT</sup> and *Lmna*<sup>WT/WT</sup> mice**  
**(A)** Heatmap showing the expression levels of differentially expressed genes in each cell cluster.  
**(B)** The UMAP plot of cardiomyocytes colored by clusters. Black line indicates a predicted trajectory.

**Fig. S3**

**A**

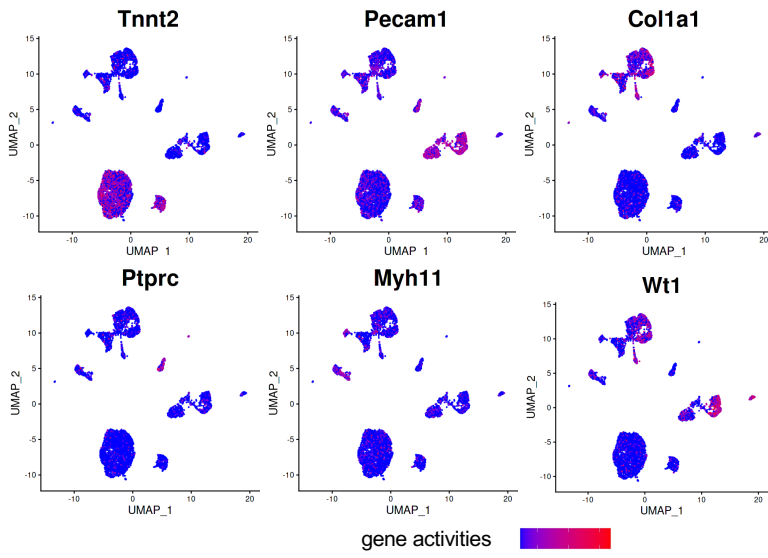

**B**

| Motif       | P-value  |
|-------------|----------|
| Esrrg       | 8.53E-18 |
| Tead3       | 3.65E-16 |
| Pparg::Rxra | 2.32E-15 |
| Esrra       | 2.93E-15 |
| Nr5a1       | 9.07E-15 |
| Nr4a2       | 1.32E-14 |
| Meis3       | 1.80E-14 |
| Nfib        | 3.23E-14 |
| Mef2c       | 4.78E-14 |
| Zrf682      | 2.98E-13 |
| Esrrb       | 3.38E-13 |
| Nfix(var.2) | 5.15E-13 |
| Rara::Rxrg  | 2.01E-12 |
| Nr1d1       | 9.28E-12 |
| Tead4       | 9.28E-12 |
| Rara(var.2) | 1.04E-11 |
| Nr1d2       | 1.24E-11 |
| Tead2       | 1.76E-11 |
| Mef2A       | 2.43E-11 |
| Rarb(var.2) | 2.85E-11 |
| Tead1       | 5.32E-11 |

**C**

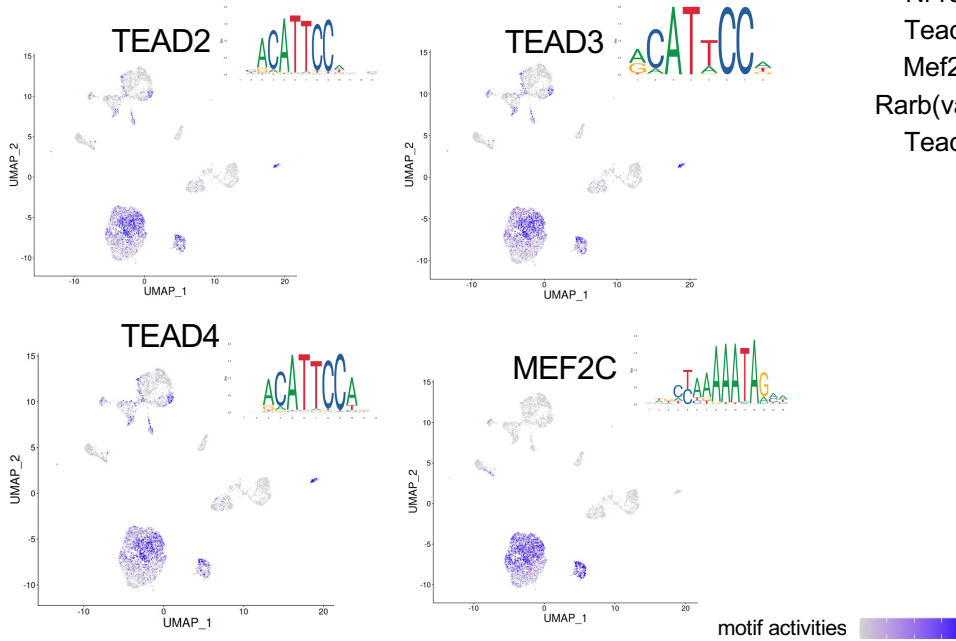

**D**

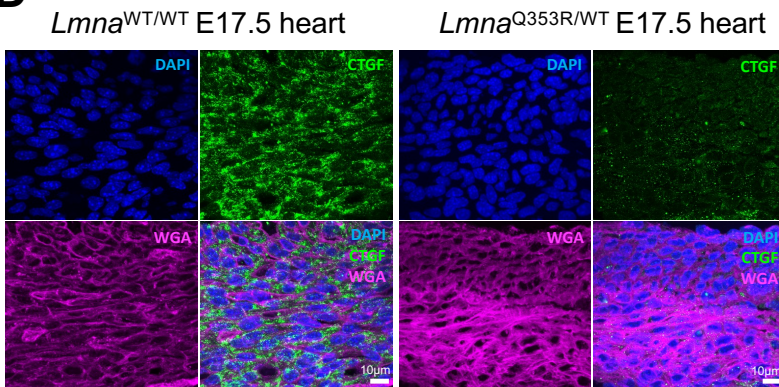

**E**

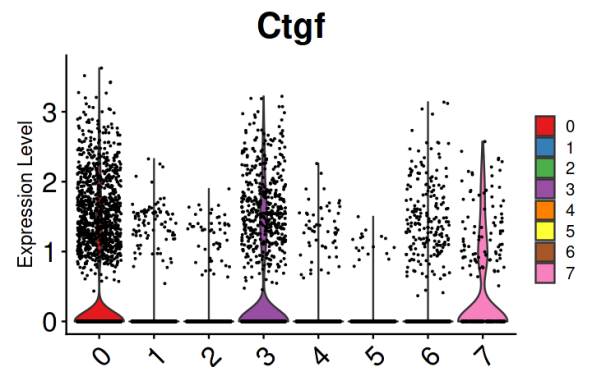



**Fig. S3. Single-cell ATAC-seq analysis of hearts from *Lmna*<sup>Q353R/WT</sup> and *Lmna*<sup>WT/WT</sup> mice**

**(A)** Gene activities (summed accessibility from gene body and promoter) of the representative genes of each cell type as visualized on the UMAP plot.

**(B)** Table showing motif enrichment of CM cluster 0.

**(C)** Motif activities of TEAD2, TEAD3, TEAD4, and MEF2C as visualized on the UMAP plot.

**(D)** Immunostaining of CTGF in cardiac tissues from *Lmna*<sup>WT/WT</sup> and *Lmna*<sup>Q353R/WT</sup> knock-in mice. DAPI, 4',6-diamidino-2-phenylindole; WGA, wheat germ agglutinin.

**(E)** Violin plot showing the expression levels of *Ctgf* in cardiomyocyte clusters which correspond to **Fig. 2B**.

# Fig. S4

## A

Patient III -1, 3

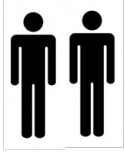

Hg19, chr1:156,105,783-156,105,827  
 Wild-type allele: GGGAGATGCCCGAGATGCGGGCAAGGATGCAGCAGCAGCTGGACG  
 Mutant allele: GGGAGATGGCCGAGATGCGGGCAAGGATGCGGCAGCAGCAGCTGGACG  
 PAM

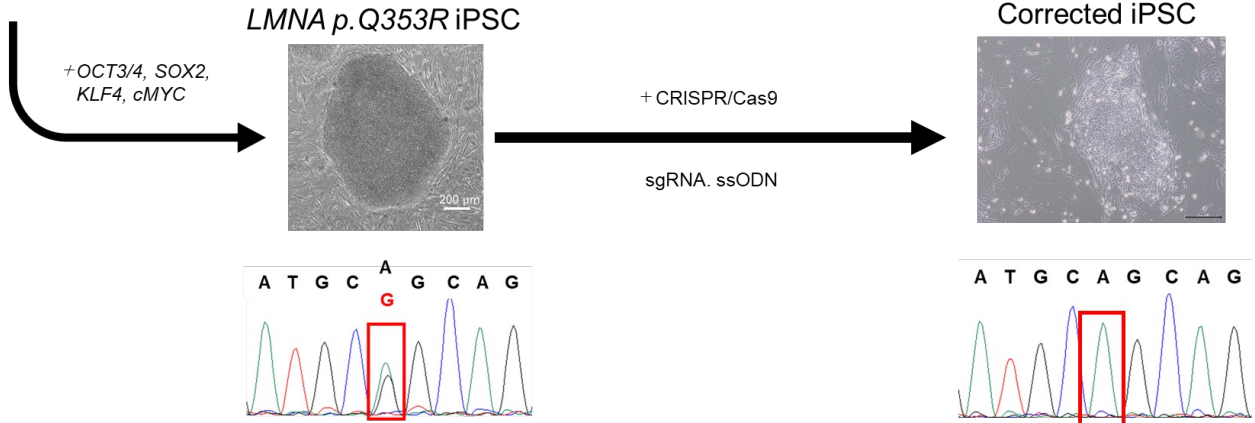

## B

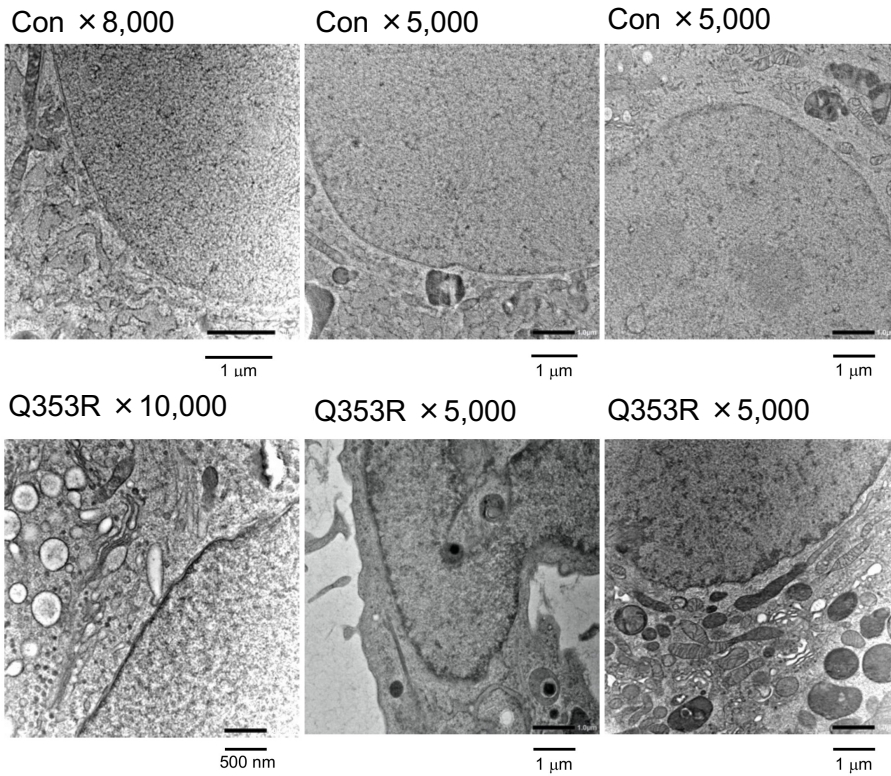

## C

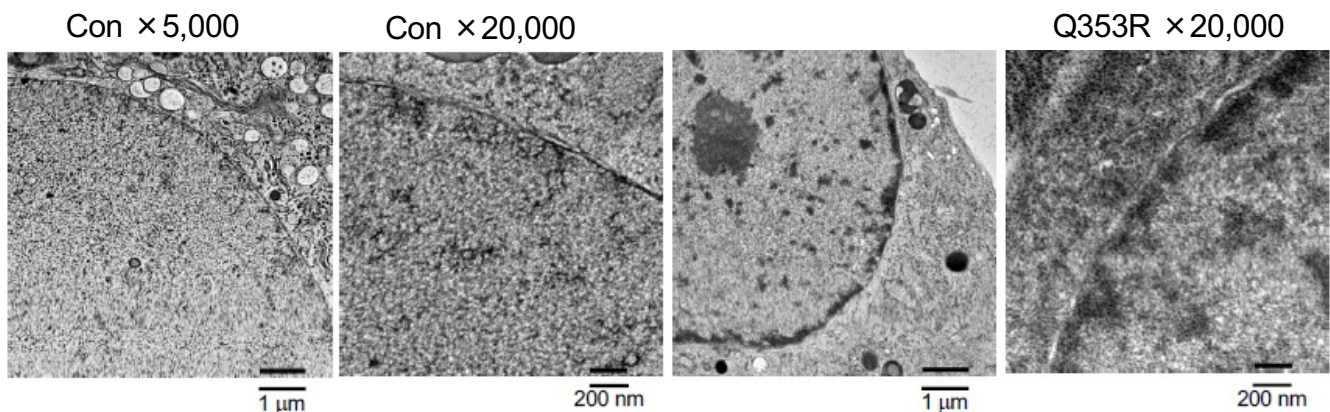

## D

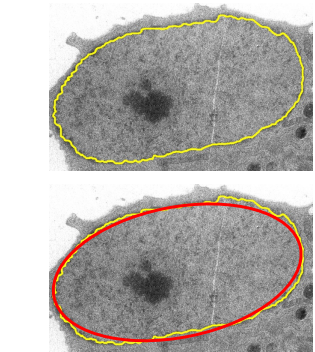

The extent of distortion of the nuclear membrane

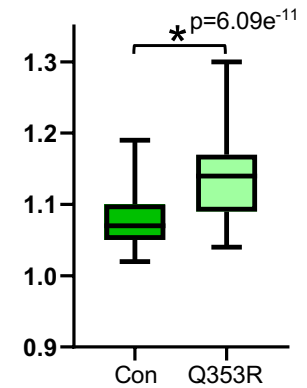

**E**

The standard deviation of densities around the nuclear membranes

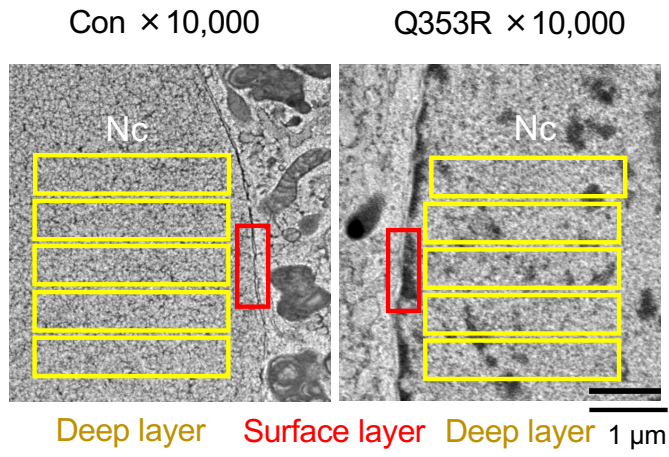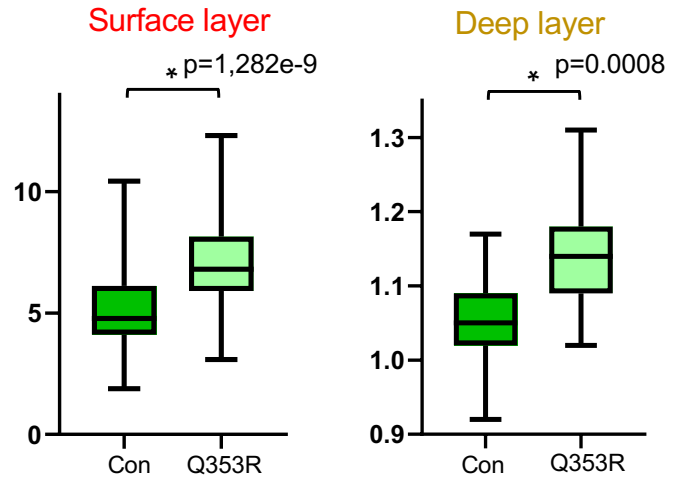

#### **Fig. S4. Electron microscopic images of iPSCMs**

**(A)** The iPSC cells were established using peripheral blood mononuclear cells from the patients. Sendai virus vectors encoding pluripotent factors were transfected for reprogramming. The isogenic control iPSC cell lines were generated by introducing sgRNA, Cas9 protein, and single-stranded oligoDNA (ssODN), to cleave and repair the mutation site and edit the mutant allele to the wild-type allele. The sgRNA was prepared to target only the mutant allele by designing the mutant base to be included in the PAM sequence.

**(B)** Electron microscopic images showing the intracellular structure of isogenic control (Con) and *LMNA*<sup>Q353R/WT</sup> (Q353R) iPSCMs.

**(C)** Electron microscopic images showing the nuclear membrane of isogenic control (Con) and *LMNA*<sup>Q353R/WT</sup> (Q353R) iPSCMs.

**(D)** The extent of distortion of the nuclear membrane obtained by comparing the trace length of the nuclear membrane on the image (yellow line) with the perimeter of the ellipse estimated from its major and minor axes (red line).  $n = 70$  (Con), 87 (Q353R), \*,  $p < 0.05$ .

**(E)** The standard deviation of densities around the nuclear membranes (surface layer, red rectangle) and inside the nuclei (deep layer, yellow).  $n = 350$  (Con), 435 (Q353R), \*,  $p < 0.05$ .

**Fig. S5**

**A**

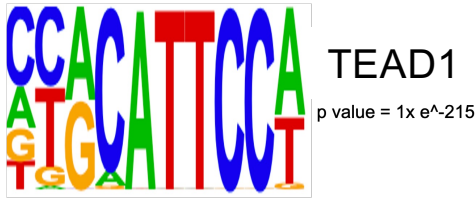

**B**

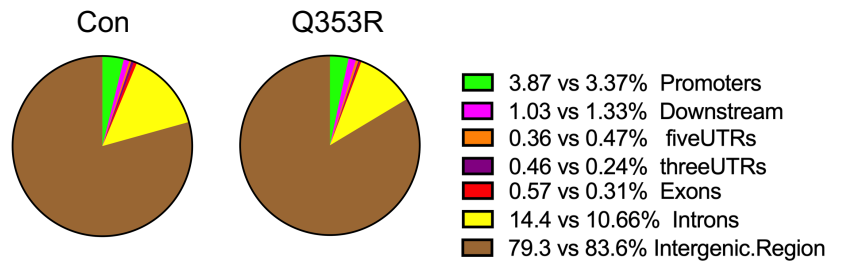

**C** TEAD1 target gene expressions in E17.5 mice

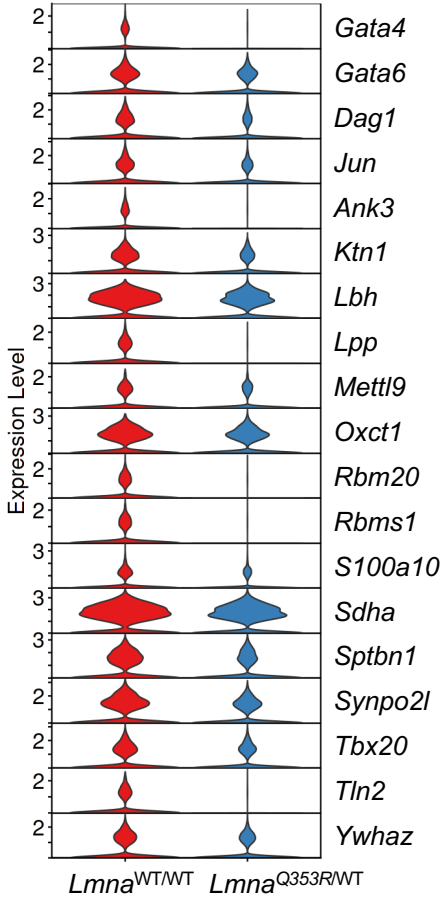

**D**

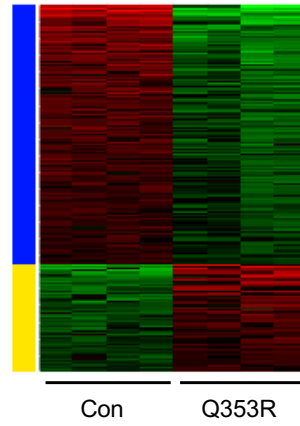

**E**

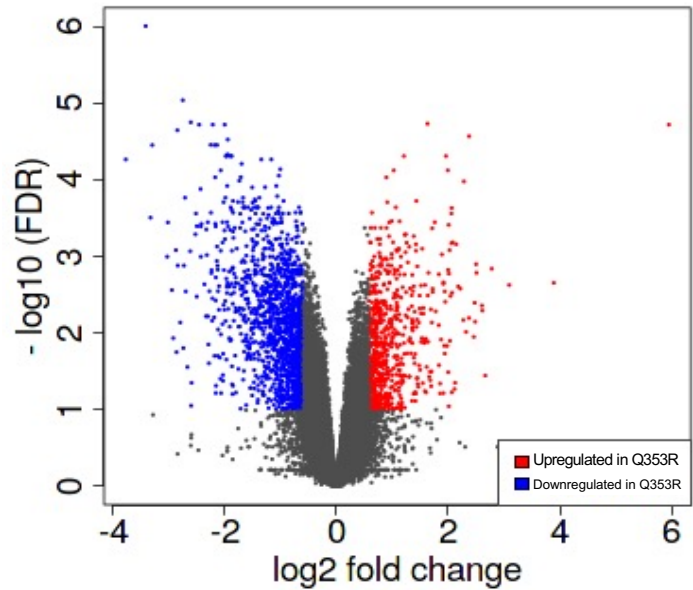

**F**

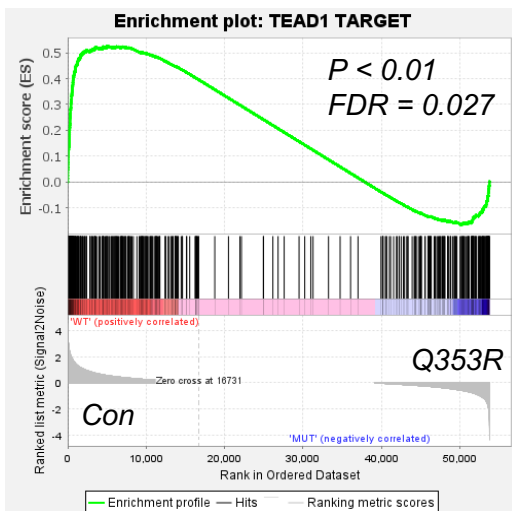

**G**

| Direction     | adjusted p-value | nGenes | Pathways                                  |
|---------------|------------------|--------|-------------------------------------------|
| downregulated | 1.8E-48          | 359    | Anatomical structure morphogenesis        |
|               | 1.1E-45          | 279    | Locomotion                                |
|               | 2.2E-43          | 299    | Movement of cell or subcellular component |
|               | 1.5E-42          | 237    | Cell migration                            |
|               | 2.1E-42          | 242    | Biological adhesion                       |
|               | 2.8E-42          | 241    | Cell adhesion                             |
|               | 2.3E-41          | 251    | Cell motility                             |
|               | 2.6E-37          | 144    | Actin cytoskeleton organization           |
|               | 2.5E-36          | 153    | Actin filament-based process              |
|               | 6.5E-34          | 103    | Extracellular matrix organization         |
|               | 2.4E-32          | 320    | Regulation of developmental process       |
|               | 2.4E-32          | 156    | Regulation of cell migration              |
|               | 5.2E-32          | 169    | Cell morphogenesis                        |

**Fig. S5. Induction of muscle structure genes via TEAD1 is impaired in *LMNA*<sup>Q353R/WT</sup> iPSCMs**

**(A)** Motif analysis of TEAD1 binding regions in control iPSCMs.

**(B)** Pie chart of global enrichment profile of TEAD1 binding regions in control iPSCMs (Con) and *LMNA* Q353R iPSCMs (Q353R).

**(C)** Violin plots showing TEAD1 target gene expressions according to scRNA-seq analysis of E17.5 mice.

**(D)** Heatmap of differentially expressed genes in RNA-seq analysis of Con and Q353R iPSCMs ( $n = 4$  samples, each). Blue: genes upregulated in Con ( $n = 1,624$  genes), yellow: genes upregulated in Q353R ( $n = 754$  genes).

**(E)** Volcano plot showing the genes whose expression were upregulated (red) and downregulated (blue) in Q353R iPSCMs. FDR, false discovery rate.

**(F)** GSEA analysis showing that TEAD1 target genes were significantly enriched in genes which were highly expressed in Con compared with Q353R.

**(G)** Gene ontology enrichment analysis of genes downregulated in Q353R in **(D)**.

**Fig. S6**

**A**

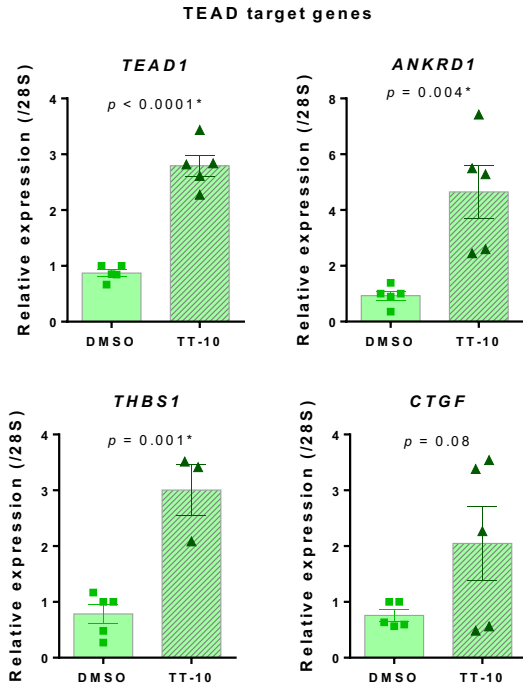

**C**

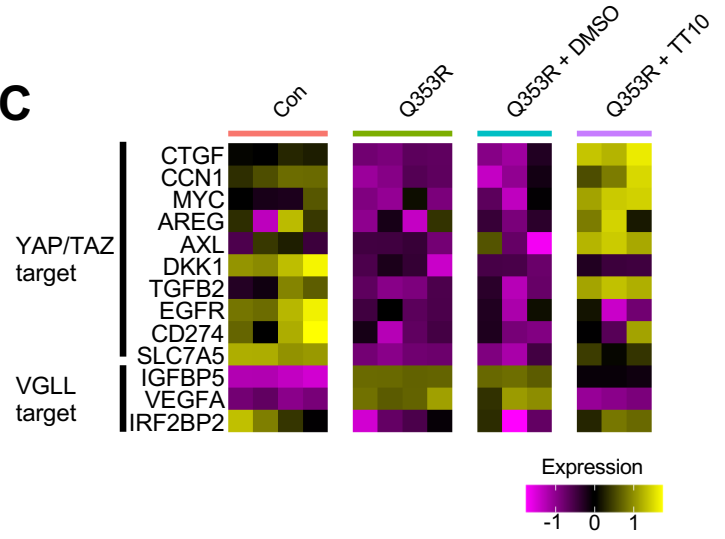

**B**

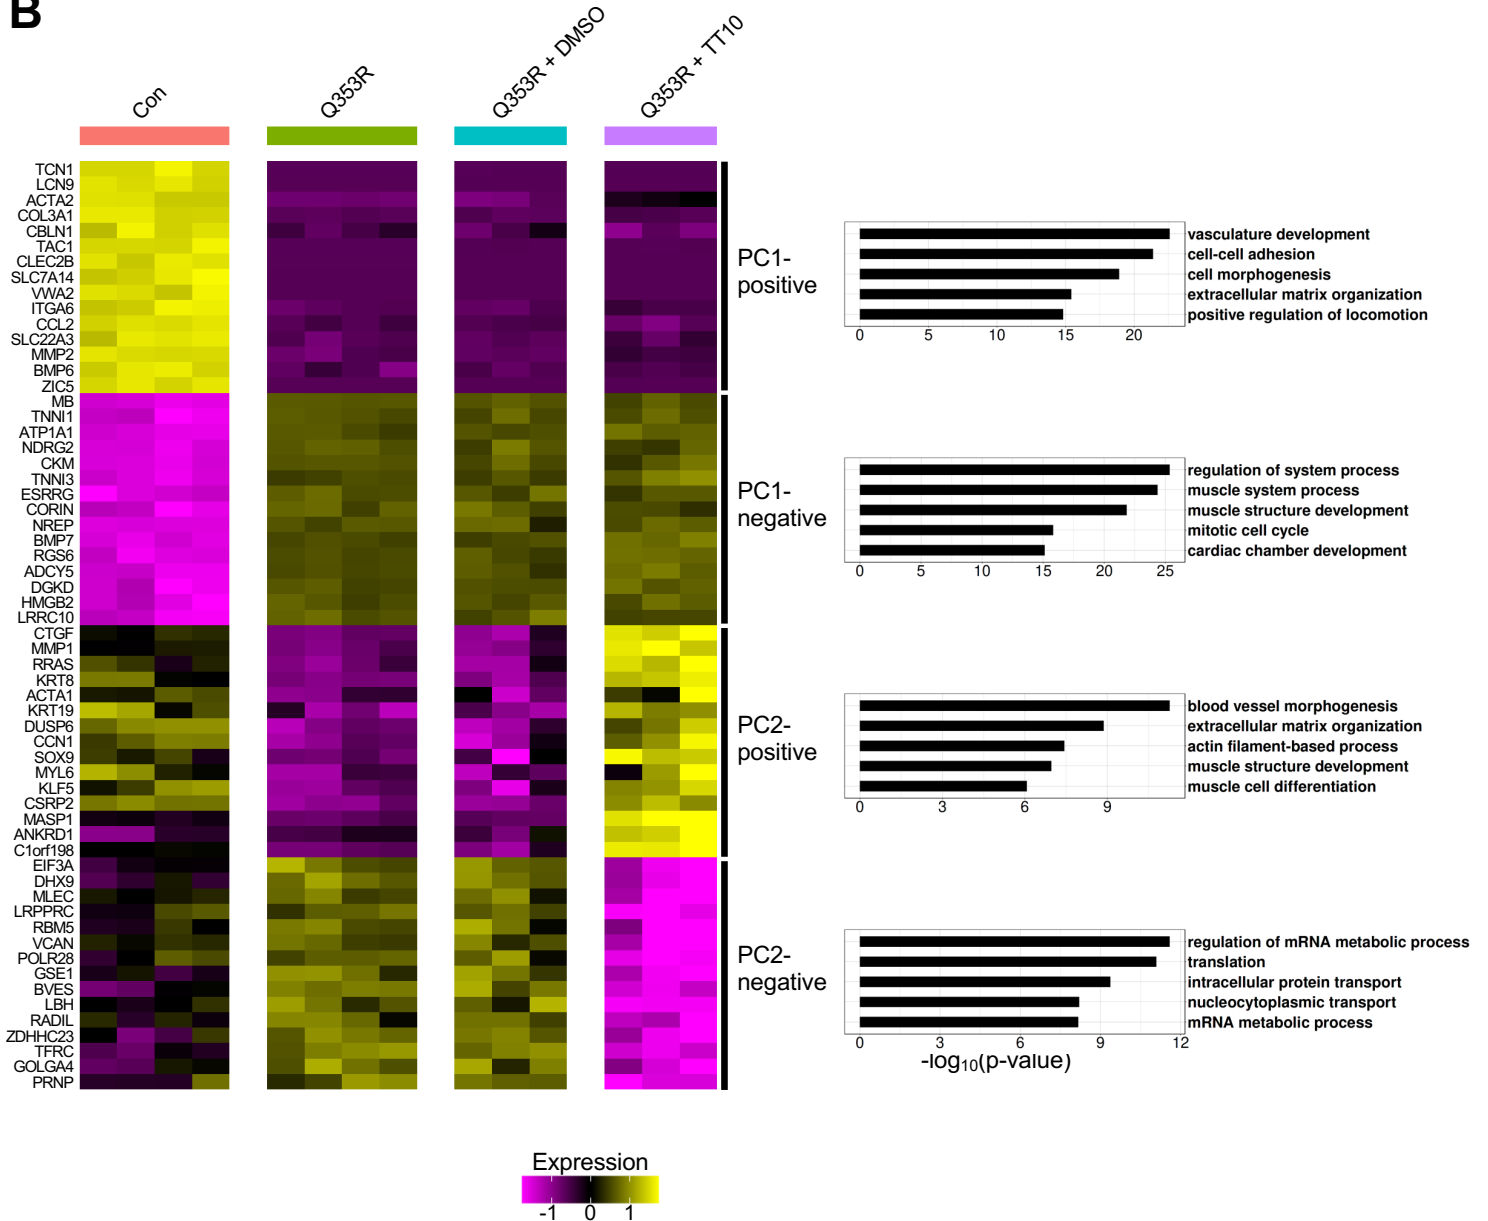

**D**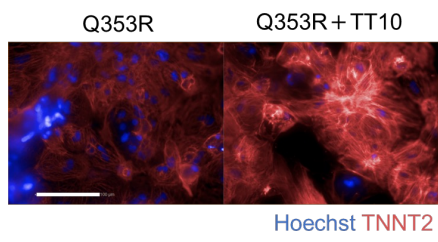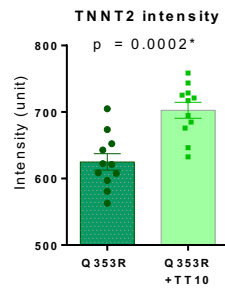**E**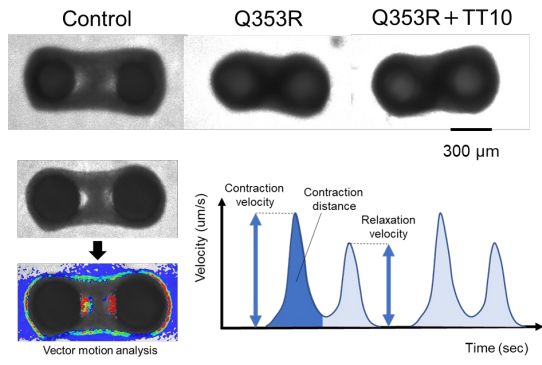



**Fig. S6. TT-10 corrects aberrant gene expression in Q353R iPSCMs.**

**(A)** qPCR analysis of Q353R iPSCMs treated with DMSO or TT-10.  $n = 5$  each, Student's  $t$ -test, \*,  $p < 0.05$ .

**(B)** Heatmap showing gene expressions of representative genes of principle component 1 and 2. Scaled data for  $\text{Log}_2(\text{RPKM} + 1)$  were utilized. Yellow indicates high expressions and purple indicates low expressions. Bar plots on the right shows each result of gene ontology analysis of top 500 genes sorted by principal component scores. Samples were obtained from Control ( $n = 4$ ), Q353R ( $n = 4$ ), DMSO-treated Q353R ( $n = 3$ ), and TT-10-treated Q353R iPSCMs ( $n = 3$ ).

**(C)** Heatmap showing gene expressions of representative YAP/TAZ target genes and VGLL target genes. Scaled data for  $\text{Log}_2(\text{RPKM} + 1)$  were utilized. Yellow indicates high expressions and purple indicates low expressions. Samples were obtained from Control ( $n = 4$ ), Q353R ( $n = 4$ ), DMSO-treated Q353R ( $n = 3$ ), and TT-10-treated Q353R iPSCMs ( $n = 3$ ).

**(D)** (Left) Representative staining images for TNNT2 in Q353R iPSCMs, with or without TT-10 treatment. Scale bar = 100  $\mu\text{m}$ . (Right) Evaluation of TNNT2 intensity per cell. ( $n = 11$  per group)

**(E)** Representative images of microtissues made of iPSCMs and the analyzed contractile parameters obtained by live cell imager. Con, isogenic control line.

**Fig. S7**

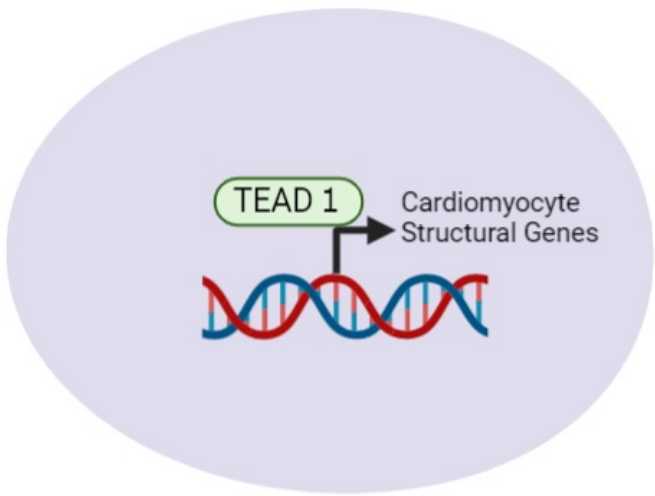

Wild type *LMNA*

- ✓ oval and smooth nuclei
- ✓ high sarcomere density
- ✓ arranged sarcomere layer

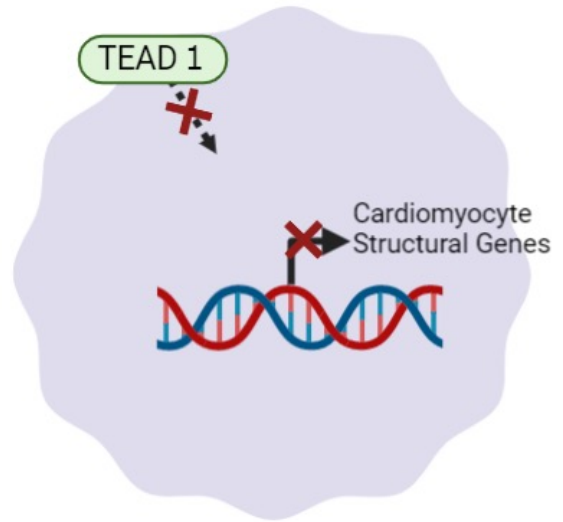

Q353R *LMNA*

- ✓ round and deformed nuclei
- ✓ low sarcomere density
- ✓ poor sarcomere layer

**Fig. S7. A schematic pathological model of *LMNA* mutation-induced DCM.**

**Table S1.** Clinical information of patients with LMNA Q353R.

**Table S2.** Top 100 genes of positively differentially expressed genes (DEGs) of each cardiomyocytes cluster ranked by avg\_log2FC in single-cell RNA-seq.

**Table S3.** The sequencing and alignment metrics of single cell ATAC-seq produced by Cell Ranger ATAC

**Table S4.** The genes with higher peaks in control iPSCM than in Q353R iPSCM from H3K4me3 CUT&RUN analysis.

**Table S5.** Control iPSCM specific TEAD1 target genes by CUT&RUN analysis.

**Table S6.** Downregulated genes in Q353R iPSCMs in RNA-seq

**Table S7.** Results of protein array screening

**Table S8.** The Result of principal component analysis of bulk RNA-seq after treatment with TT-10.

**Table S9.** The primers used for quantitative real-time PCR.
